# Supplementary material
Source: PubMed Central journal article supplement (PMC7521080)
Supplement: NIHMS1627531-supplement-Supplemental_Figures_S1-S2.pdf [file NIHMS1627531-supplement-Supplemental_Figures_S1-S2.pdf]

**Supplemental Figure S1. Cumulative overall response rate per metformin use.**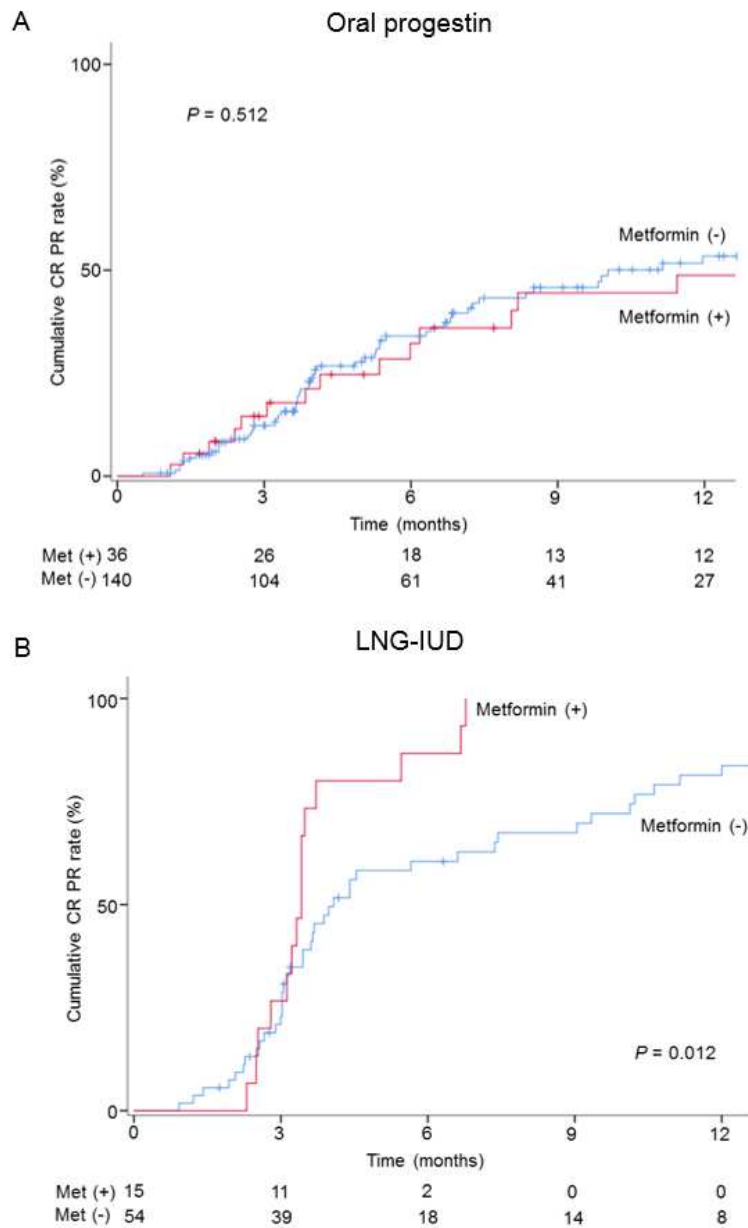

Log-rank test for P-values. Cumulative rate of CR or PR is compared to metformin users and non-users in (A) oral progestin therapy and (B) LNG-IUD therapy. Abbreviations: CR, complete response; PR, partial response; and LNG-IUD, levonorgestrel-releasing intrauterine device.

**Supplemental Figure S2. Adjustment models for association between metformin use and overall response (oral progestin and LNG-IUD cohorts).**

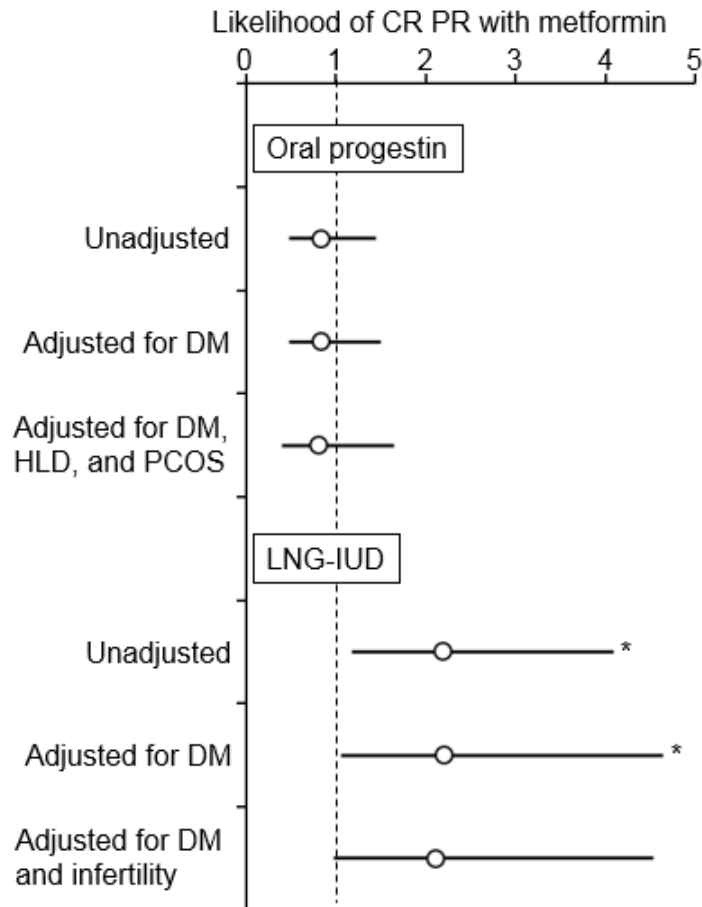

\*  $P < 0.05$ . Cox proportional hazard regression test for adjustment models. Circles represent hazard ratio for the likelihood of CR or PR with metformin compared to non-metformin. Bars represent 95% confidence interval. Abbreviations: CR, complete response, PR, partial response; DM, diabetes mellitus; HLD, hyperlipidemia, PCOS, polycystic ovarian syndrome; and LNG-IUD, levonorgestrel-releasing intrauterine device.
